# Supplementary material
Source: PubMed Central journal article supplement (PMC3995823)

**A**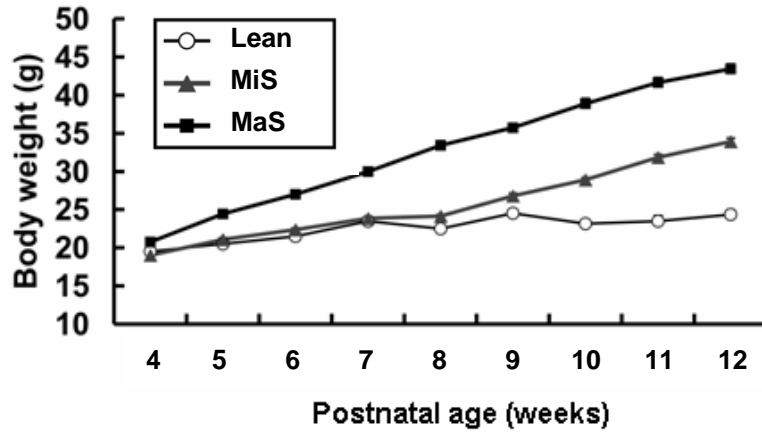**B**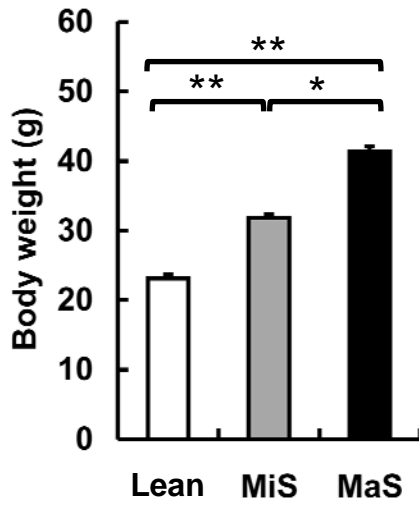**C**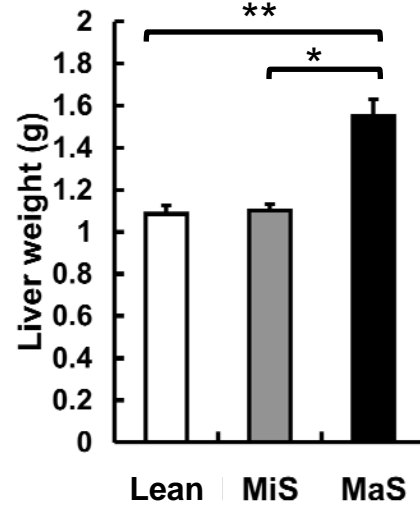**D**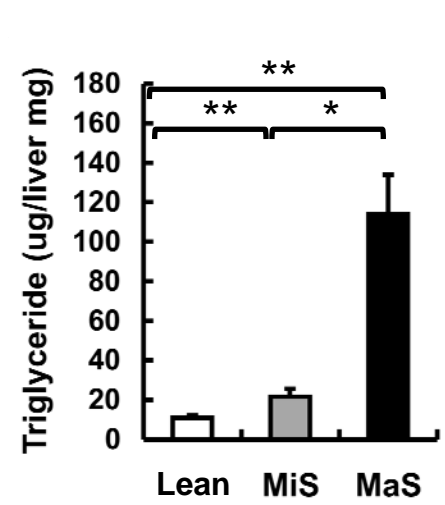**E**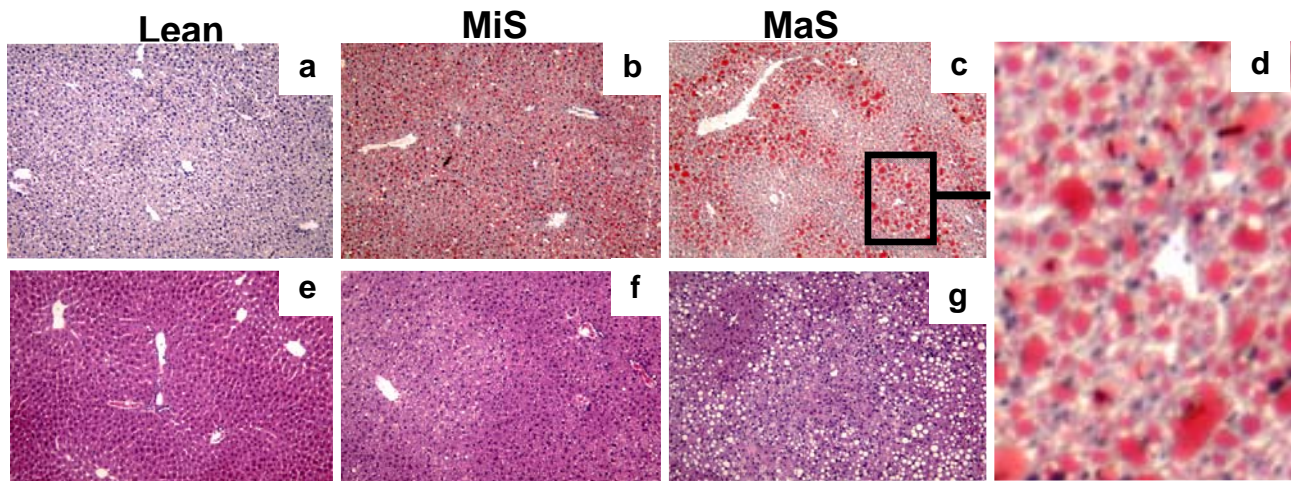

**A**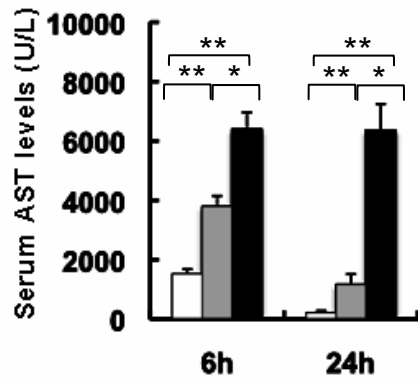**B**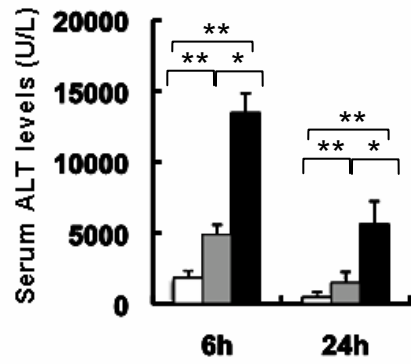**C**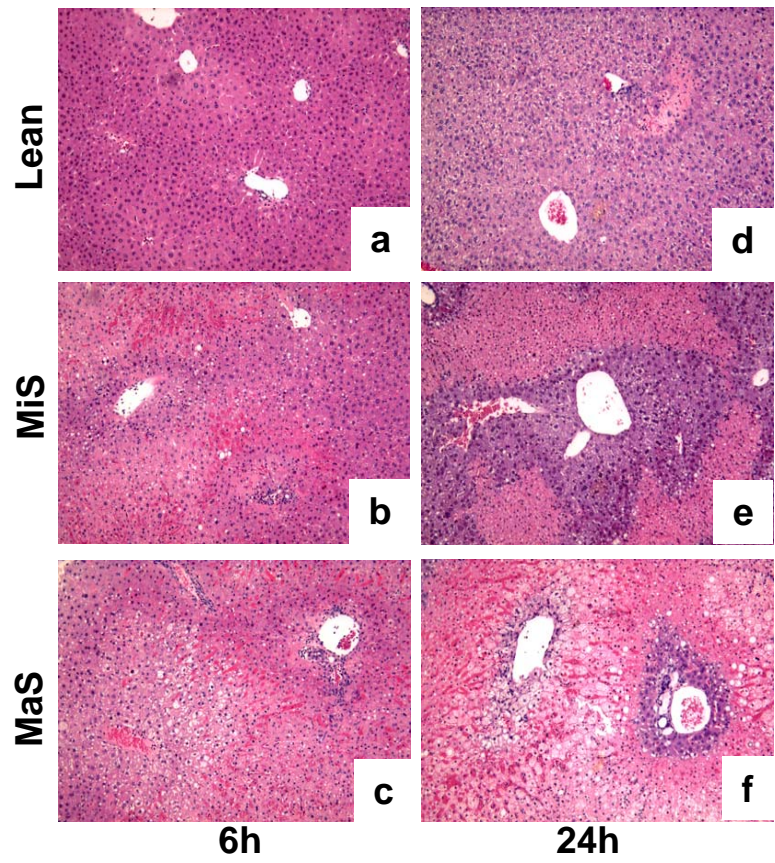**D**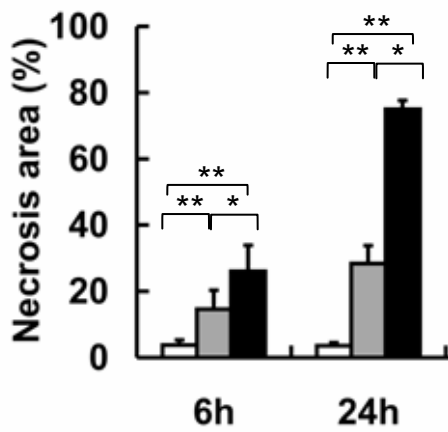**E**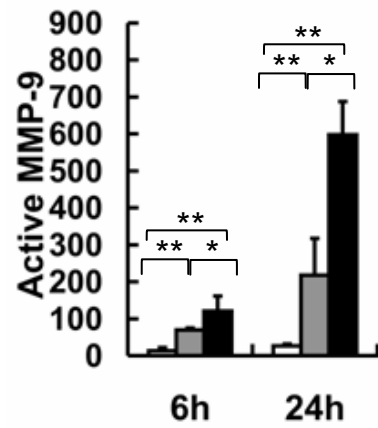

**A**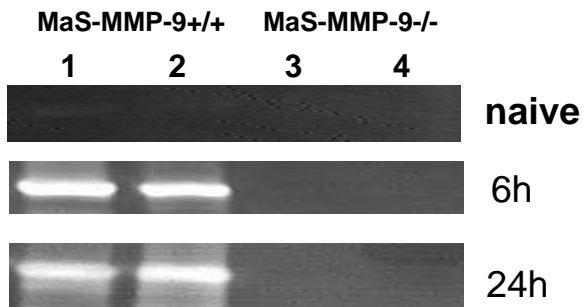**B**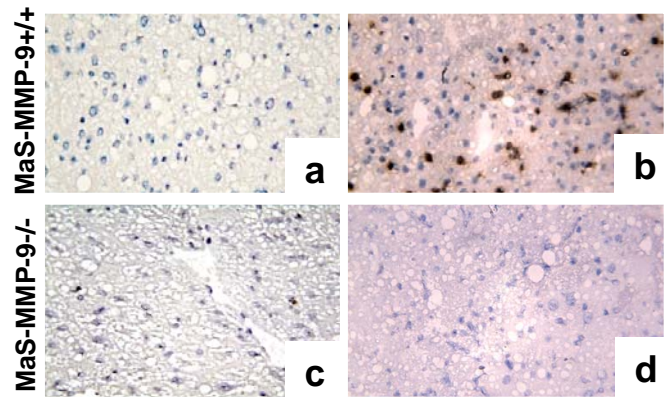**C**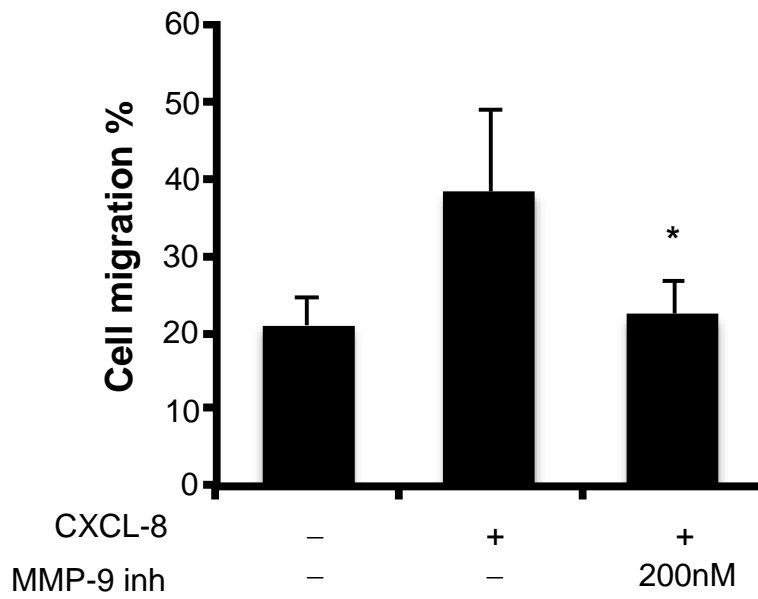

Supplement: NIHMS554720-supplement-02.pdf [file NIHMS554720-supplement-02.pdf]
